# Supplementary material for: Ozanimod: A Review in Ulcerative Colitis
Source: PubMed Central journal article supplement — Drugs. 2022 Aug 22;82(12):1303–13. doi: 10.1007/s40265-022-01762-8 (PMC9499884; doi:10.1007/s40265-022-01762-8), 2022-08-22
Supplement: 40265_2022_1762_MOESM1_ESM.pdf [file 40265_2022_1762_MOESM1_ESM.pdf]

## Ozanimod: Adis Evaluation

### Clinical Considerations

- First sphingosine-1-phosphate receptor (S1PR) modulator approved to treat moderately to severely active ulcerative colitis
- Significantly improves clinical remission rates relative to placebo as induction and maintenance therapy
- Generally well tolerated; infection-related or cardiovascular adverse events (AEs) are manageable and transient

### Plain Language Summary

#### *Background and rationale*

- Ulcerative colitis is a chronic inflammatory bowel disease involving a dysregulated immune response in the intestinal mucosa.
- Conventional therapy options for moderate to severe ulcerative colitis are initially effective, but associated with increased risk of adverse events, resistance to treatment, or loss of response over time.
- Consequently, small molecule drugs have become of interest as alternative treatment options.
- Ozanimod (Zeposia®) is an oral drug that targets and modulates the activity of S1PR to reduce the movement of lymphocytes from the lymph nodes to sites of inflammation.

#### *Clinical findings*

- Compared with placebo, ozanimod significantly improved rates of clinical remission and was generally well tolerated in adults with moderately to severely active ulcerative colitis.
- Findings from open-label extension studies suggest that ozanimod remains efficacious and generally well tolerated with long-term use.

#### *Conclusion*

Although further data will be beneficial, ozanimod expands the treatment options for adults with moderately to severely active ulcerative colitis.

This plain language summary represents the opinions of the author. For a full list of declarations, including funding and author disclosure statements, please see the full text online. © Springer Nature Switzerland AG 2022.
